# Supplementary material for: Formal consensus study on surgery to replace the aortic valve in adults aged 18–60 years
Source: HighWire-hosted journal article supplement (doi:10.1136/heartjnl-2022-321740), 2023-02-27
Supplement: heartjnl-2022-321740supp001_data_supplement.pdf [file heartjnl-2022-321740supp001_data_supplement.pdf]

## Supplementary material

Table S1. Definitions

|                                                                     |                                                | Survey definitions                                                                                                                                                                                                                                                                                                                                                                                                                                                                                                                                                                                                                           |
|---------------------------------------------------------------------|------------------------------------------------|----------------------------------------------------------------------------------------------------------------------------------------------------------------------------------------------------------------------------------------------------------------------------------------------------------------------------------------------------------------------------------------------------------------------------------------------------------------------------------------------------------------------------------------------------------------------------------------------------------------------------------------------|
| <b>Cardiac anatomy</b>                                              |                                                |                                                                                                                                                                                                                                                                                                                                                                                                                                                                                                                                                                                                                                              |
| Root dimension                                                      | Small<br>100-125% of normal<br>>125% of normal | <p><b>Root dimension</b><br/>The annulus is normal or at least big enough to allow the insertion of a conventional AVR without causing patient-prosthesis mismatch (PPM). The aorta above the annulus up to the level of the sino-tubular junction is abnormal.</p> <p>Small root: TAVI may be contraindicated as a small root is associated with low coronary arteries. Ozaki may require technical modifications.</p> <p>Large root: Ozaki may be contraindicated. Ross may require technical modifications (interposition tube or externally supported root). AVR can be done as part of the root replacement if clinically indicated</p> |
| Annulus dimension                                                   | Small<br>Large                                 | <p>Annulus dimension<br/>Assume pulmonary valve (PV) is normal in size.</p> <p>Small annulus: Conventional AVR would result in severe patient-prosthesis mismatch (PPM) without annular enlargement. Ross would require a Konno or mini-Konno incision (fibrous annulus only).</p> <p>Large annulus: A Ross is technically possible only with AV annular reduction. Contraindication to Ozaki/TAVI if annulus is outside the treatable range (i.e. sizes and devices not available in bigger sizes).</p>                                                                                                                                     |
| Small left ventricular outflow tract (LVOT) dimension               |                                                | <p>Left ventricular outflow tract (LVOT) dimension<br/>Normal LVOT: LVOT is not a factor in valve choice.</p> <p>Small LVOT: There is tunnel-like obstruction which needs fixing by Konno-type surgery in addition to valve replacement</p>                                                                                                                                                                                                                                                                                                                                                                                                  |
| Size discrepancy between aortic valve (AV) and pulmonary valve (PV) | AV < PV<br>AV > PV                             | <p>Size discrepancy between aortic valve (AV) and pulmonary valve (PV)<br/>If size discrepancy is significant annular reduction or enlargement is needed for Ross, but Ross is technically feasible.</p>                                                                                                                                                                                                                                                                                                                                                                                                                                     |
| Left anterior descending artery (LAD) crosses the                   |                                                | Left anterior descending artery (LAD) crosses the right ventricular outflow tract (RVOT)                                                                                                                                                                                                                                                                                                                                                                                                                                                                                                                                                     |

|                                                                                                                                                                                                                              | Survey definitions                                                                                                                                                                                                                                                    |
|------------------------------------------------------------------------------------------------------------------------------------------------------------------------------------------------------------------------------|-----------------------------------------------------------------------------------------------------------------------------------------------------------------------------------------------------------------------------------------------------------------------|
| right ventricular outflow tract (RVOT)                                                                                                                                                                                       | <i>The autograft cannot be safely lifted for Ross</i>                                                                                                                                                                                                                 |
| Pulmonary valve (PV) dysfunction<br>Bicuspid but otherwise fully functional<br>Preoperative mild regurgitation<br>Preoperative mild stenosis<br>Intraoperatively PV is thin looking with fenestrations, dysplastic or doming | Pulmonary valve (PV) dysfunction<br>Bicuspid but otherwise fully functional<br>Preoperative mild regurgitation<br>Preoperative mild stenosis<br>Intraoperatively PV is thin looking with fenestrations, dysplastic or doming                                          |
| Bicuspid aortic valve (AV) without symptomatic connective tissue phenotype or high-risk genotype                                                                                                                             | Bicuspid aortic valve without symptomatic connective tissue phenotype or high-risk genotype<br><i>Both Ross and Ozaki possible</i>                                                                                                                                    |
| Aneurysm of the ascending aorta                                                                                                                                                                                              | Aneurysm of the ascending aorta<br><i>The root is within reasonable limits, the abnormal dilatation of the aorta is in the ascending part, above the root. Ozaki and TAVI may have relative contraindications if the sino-tubular junction is borderline dilated.</i> |
| <b>Presentation</b>                                                                                                                                                                                                          |                                                                                                                                                                                                                                                                       |
| Aortic stenosis (dominant lesion)                                                                                                                                                                                            | Aortic stenosis (dominant lesion)                                                                                                                                                                                                                                     |
| Aortic regurgitation (dominant lesion)                                                                                                                                                                                       | <b>Aortic regurgitation (dominant lesion)</b>                                                                                                                                                                                                                         |
| Emergency presentation                                                                                                                                                                                                       | <i>The operation has to be performed within 24 hrs.</i>                                                                                                                                                                                                               |
| Left ventricular function                                                                                                                                                                                                    | Good (>55%)<br>Moderate (35-55%)<br>Poor (<35%)                                                                                                                                                                                                                       |
| High thromboembolic risk                                                                                                                                                                                                     | Thromboembolic risk (history of embolism, clotting disorder, poor compliance with anti-thrombotic medication)                                                                                                                                                         |

|                                                                                                                                | Survey definitions                                                                                                                                                                                                           |
|--------------------------------------------------------------------------------------------------------------------------------|------------------------------------------------------------------------------------------------------------------------------------------------------------------------------------------------------------------------------|
| High bleeding risk                                                                                                             | Bleeding risk (any history of severe bleeding, bleeding disorder, end-organ lesion prone to bleeding, e.g brain aneurysm, severe inflammatory bowel disease)                                                                 |
| Surgical risk                                                                                                                  | Low (EuroSCORE II 0-3%)<br>Medium (EuroSCORE II 3-6%)<br>High (EuroSCORE II >6%)                                                                                                                                             |
| Active endocarditis                                                                                                            | <b>Active endocarditis</b>                                                                                                                                                                                                   |
| Aortopathy<br>No connective tissue weakness<br>Severe (e.g. Marfan, Ehler-Danlos, etc.)                                        | Mild/moderate (bicuspid aortopathy without evidence of connective tissue weakness)<br>Severe (syndromic / severe connective tissue disease, e.g. Marfan, Ehler-Danlos, Loeys-Dietz or malignant connective tissue mutations) |
| Previous sternotomy                                                                                                            | <b>Previous sternotomy</b>                                                                                                                                                                                                   |
| Previous thoracic radiotherapy                                                                                                 | Previous thoracic radiotherapy (everything looks reasonable when opening the chest)                                                                                                                                          |
| <b>Cardiac comorbidities</b>                                                                                                   |                                                                                                                                                                                                                              |
| Mitral valve (MV) disease which requires surgery as a secondary indication<br>MV amenable to repair<br>MV needs replacement    | Moderate or severe mitral valve (MV) disease which requires surgery as a secondary indication<br>MV amenable to repair<br>MV needs replacement                                                                               |
| Tricuspid valve (TV) disease which requires surgery as a secondary indication<br>TV amenable to repair<br>TV needs replacement | Moderate or severe tricuspid valve (TV) disease which requires surgery as a secondary indication<br>TV amenable to repair<br>TV needs replacement                                                                            |

|                                                                                                                                     | Survey definitions                                                                                                                                                            |
|-------------------------------------------------------------------------------------------------------------------------------------|-------------------------------------------------------------------------------------------------------------------------------------------------------------------------------|
| History of endocarditis (aortic valve affected, pulmonary valve not affected, no active infection)                                  | History of endocarditis (AV affected, PV not affected, no active infection)                                                                                                   |
| History of rheumatic heart disease<br>PV looks abnormal on echo<br>PV looks normal on echo and intraoperatively                     | History of rheumatic heart disease<br>PV looks abnormal on echo<br>PV looks normal on echo and intraoperatively                                                               |
| Needs revascularisation<br>Coronary artery bypass grafting (CABG)<br>Percutaneous coronary intervention (PCI)<br>Either CABG or PCI | Patient requires revascularisation for coronary artery disease<br>Coronary artery bypass grafting (CABG)<br>Percutaneous coronary intervention (PCI)<br>Either CABG or PCI    |
| <b>Non-cardiac comorbidities</b>                                                                                                    |                                                                                                                                                                               |
| Pulmonary hypertension (systolic PA pressure >60mm Hg)                                                                              | <b>Pulmonary hypertension (systolic PA pressure &gt;60mm Hg)</b>                                                                                                              |
| Poorly controlled hypertension                                                                                                      | Poorly controlled hypertension<br><i>Medically resistant forms or poor compliance with medication.</i>                                                                        |
| Significant lung disease                                                                                                            | <b>Severe lung disease (AV surgery possible but a long operation ideally avoided)</b>                                                                                         |
| Significant liver disease                                                                                                           | <b>Significant liver disease</b><br><i>Clinical and laboratory evidence of severe coagulopathy, liver dysfunction or consideration of future liver transplant</i>             |
| Significant kidney disease                                                                                                          | <b>Significant renal disease</b><br><i>Clinical and laboratory evidence of significant kidney dysfunction, need for dialysis or consideration of future kidney transplant</i> |
| Diabetes<br>Uncomplicated                                                                                                           | <b>Diabetes</b><br><i>Complicated if accompanied by microvascular</i>                                                                                                         |

|                                                       |                                                                                   | Survey definitions                                                                                                                                                                                                                                                  |
|-------------------------------------------------------|-----------------------------------------------------------------------------------|---------------------------------------------------------------------------------------------------------------------------------------------------------------------------------------------------------------------------------------------------------------------|
| Complicated (life expectancy <10 years)               |                                                                                   | <i>disease, arteriopathy, ulcers, amputation, reduced mobility, life expectancy less than 10 years.</i>                                                                                                                                                             |
| Stroke                                                | Minor, resolved<br><br>Major, sequelae present and reduce mobility                | <b>History of stroke/transient ischaemic attack</b><br><br>Minor, resolved<br><br>Major, sequelae present and reduce mobility                                                                                                                                       |
| History of cancer (life expectancy less than 5 years) |                                                                                   | <b>History of cancer (life expectancy less than 5 years)</b>                                                                                                                                                                                                        |
| Body mass index                                       | Low (<18 kg/m <sup>2</sup> )<br><br>High (>30 kg/m <sup>2</sup> )                 | <b>Body mass index</b>                                                                                                                                                                                                                                              |
| Anorexia or intestinal absorption disorder            |                                                                                   | <b>Anorexia or intestinal absorption disorder</b><br><i>The patient is not cachectic or severely frail and a longer operation is possible. Intestinal problems suggest unpredictable absorption of warfarin and other nutrients which may affect INR stability.</i> |
| Frailty                                               | Moderate<br><br>Severe                                                            | <b>Frailty (defined using accepted criteria)</b><br><br>Moderate (a long operation possible)<br><br>Severe (a long operation ideally avoided)                                                                                                                       |
| Comorbidities that influence adherence to medication  |                                                                                   | Comorbidities that influence adherence to medication<br><i>For example, cognitive impairment, psychosis, severe anxiety or depression.</i>                                                                                                                          |
| <b>Concurrent medications and treatments</b>          |                                                                                   |                                                                                                                                                                                                                                                                     |
| Already on anticoagulation                            | With warfarin<br><br>With novel oral anticoagulant (NOAC) or antiplatelet therapy | Already on anticoagulation<br><b>With warfarin</b> (e.g. mechanical mitral valve)<br><br><b>With novel oral anticoagulant (NOAC)</b> (e.g. atrial fibrillation with moderate risk) or antiplatelet therapy                                                          |

|                                                                      |                                                                                                                         |                                                                                                                                                                                                                                                                                       |
|----------------------------------------------------------------------|-------------------------------------------------------------------------------------------------------------------------|---------------------------------------------------------------------------------------------------------------------------------------------------------------------------------------------------------------------------------------------------------------------------------------|
|                                                                      |                                                                                                                         | Survey definitions                                                                                                                                                                                                                                                                    |
|                                                                      |                                                                                                                         |                                                                                                                                                                                                                                                                                       |
| Chemotherapy (current or within the last 6 months)                   |                                                                                                                         | Chemotherapy (current or within the last 6 months)<br><i>Life expectancy is more than 5 years.</i>                                                                                                                                                                                    |
| Radiotherapy (current or within the last 6 months)                   |                                                                                                                         | Radiotherapy (current or within the last 6 months)<br><i>Life expectancy is more than 5 years.</i>                                                                                                                                                                                    |
| High dose oral steroids as replacement therapy                       |                                                                                                                         | <b>Oral steroids</b><br><i>High dose, at a level that requires perioperative replacement and raises some concerns about wound healing.</i>                                                                                                                                            |
| <b>Lifestyle</b>                                                     |                                                                                                                         |                                                                                                                                                                                                                                                                                       |
| Physical activity                                                    | Sedentary with minimal activity<br><br>Moderate to highly active<br><br>Highly active (amateur or professional athlete) | Physical activity<br><b>Inactive</b> (sedentary lifestyle with minimal activity)<br><b>Moderate to highly active</b> (engages in and values regular activities, some of which can be strenuous)<br><br><b>Athlete</b> (pursues strenuous activities at amateur or professional level) |
| Heavy drinking (exceeds recommended safe limits guidelines)          |                                                                                                                         | Heavy drinking (exceeds recommended safe limits guidelines) and unwilling or unable to restrict alcohol intake                                                                                                                                                                        |
| Reduced mobility (e.g. wheelchair bound, Parkinson's disease)        |                                                                                                                         | <b>Reduced mobility (e.g. wheelchair bound, Parkinson's disease)</b>                                                                                                                                                                                                                  |
| Working or living in a remote area with no easy access to healthcare |                                                                                                                         | <b>Working or living in a remote area with no easy access to healthcare</b>                                                                                                                                                                                                           |
| Patient considered unlikely to comply with anticoagulant medication  |                                                                                                                         | Patient considered unlikely to comply with anticoagulant medication (e.g. mental health problems, homelessness) or refuses it                                                                                                                                                         |

|                                                        | Survey definitions                                                                                                      |
|--------------------------------------------------------|-------------------------------------------------------------------------------------------------------------------------|
| Women of childbearing age                              | <p>Currently considering pregnancy</p> <p>Considering pregnancy in the future</p> <p>Does not wish to have children</p> |
| <b>Personal preference</b>                             | <b>Women of childbearing age (16-year old to menopause)</b>                                                             |
| Thinks mechanical valve sound will be disturbing       | Currently considering pregnancy                                                                                         |
| Prefers not to have further surgical intervention      | Considering pregnancy in the future                                                                                     |
| Prefers not to have warfarin anticoagulation           | Does not wish to have children                                                                                          |
| Prefers a small surgical incision for cosmetic reasons |                                                                                                                         |
| Refuses transfusion on religious grounds               |                                                                                                                         |
